# Supplementary material for: Regulation and Function of Laminin A5 during Mouse and Human Decidualization
Source: MDPI journal article supplement (doi:10.3390/ijms23010199), 2021-12-24
Supplement: s1 [file s1]

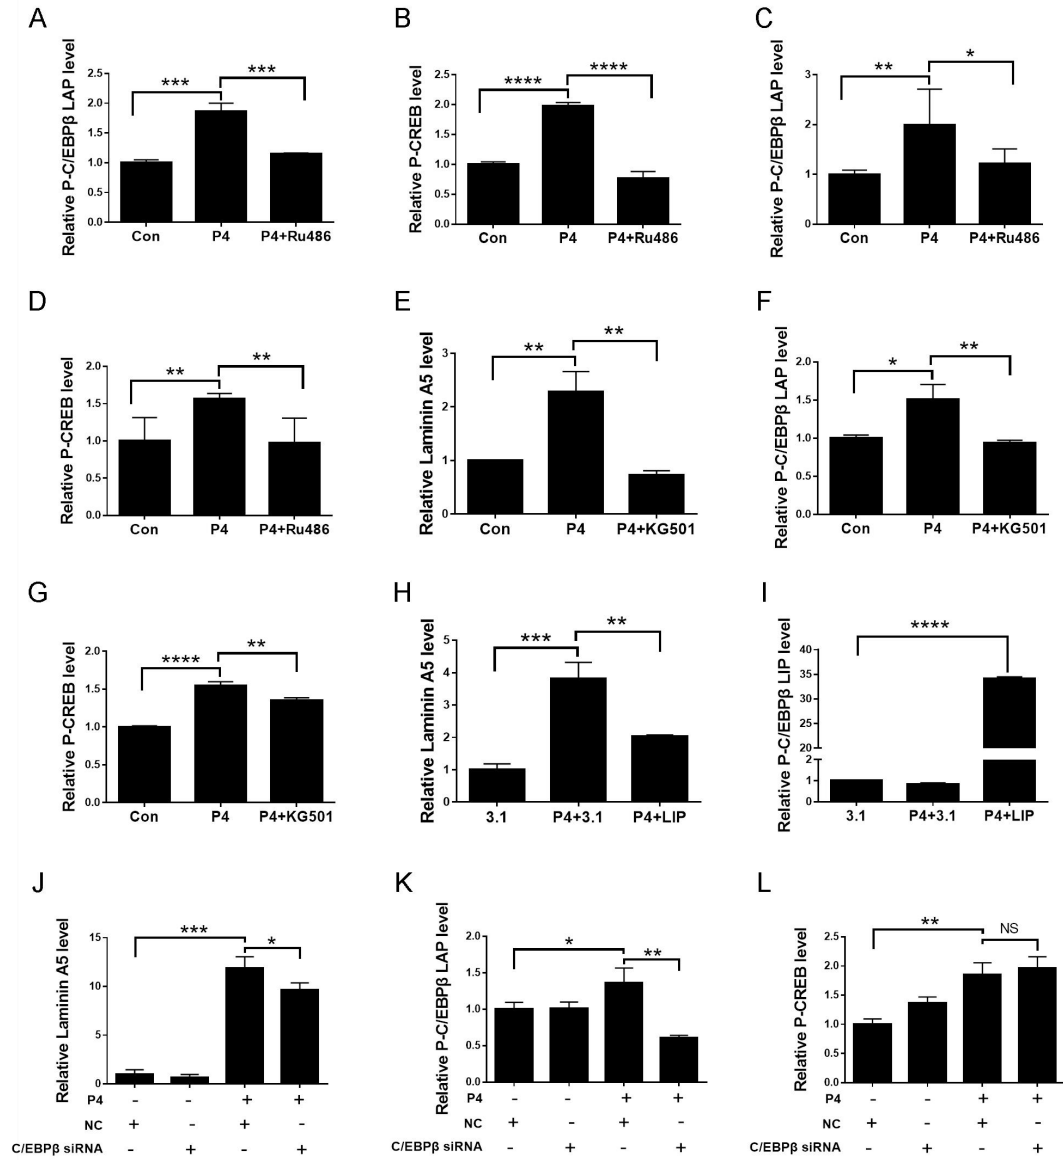

**Figure S1.** Quantification of p-C/EBPβ LAP, p-CREB, Laminin A5, and p-C/EBPβ LIP. Bars represent mean  $\pm$  SD (\*p-value < 0.05, \*\*p-value < 0.01, \*\*\*p-value < 0.001, \*\*\*\*p-value < 0.0001). NS, Not Significant.
